# Supplementary material for: First Morphological and Molecular Identification of Demodex injai in Golden Jackal (Canis aureus Linnaeus, 1758) in Romania
Source: MDPI journal article supplement (doi:10.3390/pathogens12030412), 2023-03-05
Supplement: s1 [file s1]

File: 410\_P2.ab1 Run Ended: 2022/4/6 8:13:28 Signal G:819 A:1400 C:912 T:2636  
Sample: 410\_P2 Lane: 44 Base spacing: 14.922829 1606 bases in 24637 scans Page 1 of 2

10 20 30 40 50 60 70 80 90 100 110 120  
T C T T A C T T G T A T G A G T G G A G T T A T G G A G G T T T T T A T A A C G G T T T T T A G C T G A A T T T G A T T A T C T G T G A A A A G T T A G A T T T G T T T C A A A G A C G A G A A G A C C C C G A A T C T T T A T T

130 140 150 160 170 180 190 200 210 220 230 240  
T T A A A T A A T G G G T T T A A T T T T T G T T G G G G A A A G T T A A T T T G T A T T A T T T T T T T T T G G G G G A A C T T T G T T A G G T T G A G G G A C G G A G A C T T C G G G G T T A C C G G A T A A T T T T C T T T T T

250 260 270 280 290 300 310 320 330 340 350 360 370  
A A G A C C C T A T T T T C G G G G G A G A T T G T C A C C T C T G G T T G T T T T T A T G A T C A A C G G A A C A A G T T A C C T A G G G A T A A C A G C G C A A T C C T A T T C A A G A G T C C A T A T C G A C A A T A G G G T T A C G A C

380 390 400 410 420 430 440 450 460 470 480 490  
C T C G A T G T T G G C T T T T G A A A C C T G T G A T T A A G A C C T C T T C T A C G G C G A T C T G A G T C A T C A C A G C A A C A T C T C A C A T G A A T G G T T A T C T A T G T C G G A C T A T G T G A A A G G T C T C C

Nucleotide

GenBank

### Demodex injai mitochondrial partial 16S rRNA gene, strain Di 1

GenBank: HE817765.1

[FASTA](#) [Graphics](#)

---

[Go to:](#)

LOCUS HE817765 439 bp DNA linear INV 18-SEP-2012

DEFINITION Demodex injai mitochondrial partial 16S rRNA gene, strain Di 1.

ACCESSION HE817765

VERSION HE817765.1

KEYWORDS .

SOURCE mitochondrion Demodex injai

ORGANISM [Demodex injai](#)

Eukaryota; Metazoa; Ecdysozoa; Arthropoda; Chelicerata; Arachnida; Acari; Acariformes; Trombidiformes; Prostigmata; Eleutherengona; Raphignathae; Cheyletoidea; Demodicidae; Demodex.

REFERENCE 1

AUTHORS de Rojas,M., Riazco,C., Callejon,R., Guevara,D. and Cutillas,C.

TITLE Molecular study on three morphotypes of Demodex mites (Acarina: Demodicidae) from dogs

JOURNAL Parasitol. Res. 111 (5), 2165-2172 (2012)

PUBMED [22895570](#)

REFERENCE 2 (bases 1 to 439)

AUTHORS De Rojas,M.

TITLE Direct Submission

JOURNAL Submitted (14-MAY-2012) Universidad de Sevilla, Microbiology and Parasitology, Profesor Garcia Gonzalez no 2, Sevilla 41012, SPAIN

FEATURES Location/Qualifiers

source 1..439

/organism="Demodex injai"

/organelle="mitochondrion"

/mol\_type="genomic DNA"

/strain="Di 1"

/db\_xref="taxon:[1191121](#)"

[gene](#) <1..>439

/gene="16S rRNA"

[rRNA](#) <1..>439

/gene="16S rRNA"

/product="16S ribosomal RNA"

ORIGIN

```

1 gctcaatgat tttttaaatt gctgcggtat ttgactgtg ctaaggtagc gaagtcattt
61 gctcttttat tgagaacttg tatgagtgga gttatggagg tttttttata aacggttttt
121 tagctgaatt tgatttatct gtgaaaagtt agatttgttt tcaaagacga gaagaccccg
181 aaatctttat tttaaaataa tgggttttaa ttttgtttg ggggaaaagt taatttgtat
241 tatttttttt tttagtgtga actttgttag gttaaatgga tagatacttc ggggttaaca
301 ggataatttt cttttgaagt tcttatttta gagggagatt gttacctcga tgttggtttt
361 tagtattaat tgggggtagg ttttcatatt tatagtctgt tcgactattg aatctaaaca
421 tgatctgagt tcagaccgg
//

```

Figure S2. Sequences with the highest similarity to the PCR product obtained from the amplification of samples
